# Supplementary material for: High-throughput, single-copy sequencing reveals SARS-CoV-2 spike variants coincident with mounting humoral immunity during acute COVID-19
Source: PLOS journal article supplement (doi:10.1371/journal.ppat.1009431), 2021-04-08

**A**

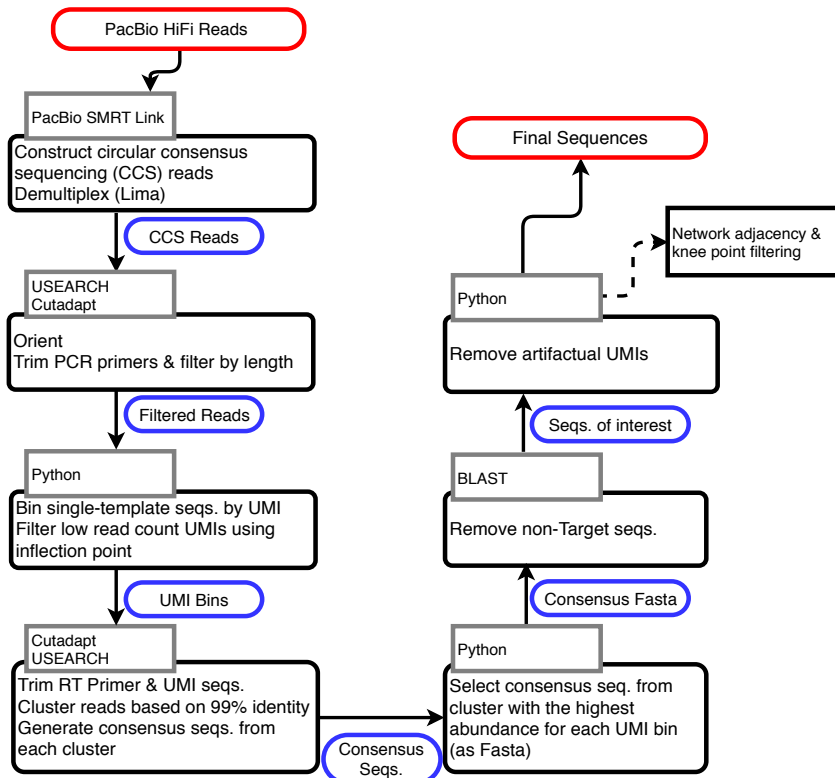

**B**

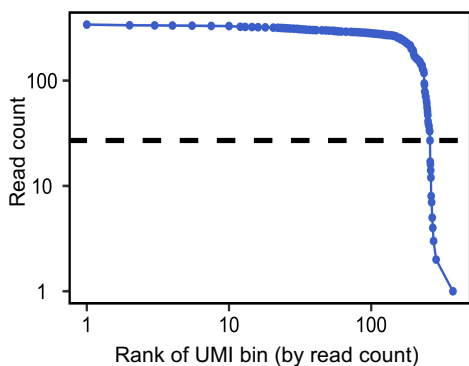

**C**

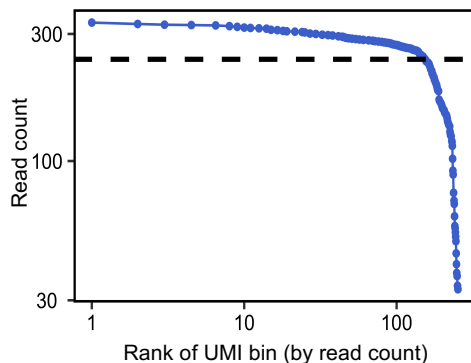

Supplement: S2 (10.1371/journal.ppat.1009431.s002) [file journal.ppat.1009431.s002]
